# Supplementary material
Source: MDPI journal article supplement (https://www.mdpi.com/2071-1050/13/12/6756)
Supplement: s1 [file s1]

# Supplementary Materials:

**Table S1.** Concrete Strength (MPa) under different Curing Condition and Curing Age using Vesicular Basalt aggregates.

| Curing method                                        | Cube Compressive Strength<br>(Surface /Volume Ratio = 40,<br>w/c=0.5) |        |         | Cylindrical Compressive<br>Strength (Surface /Volume<br>Ratio = 26.4, w/c=0.5) |        |         |
|------------------------------------------------------|-----------------------------------------------------------------------|--------|---------|--------------------------------------------------------------------------------|--------|---------|
|                                                      | 3 days                                                                | 7 days | 28 days | 3 days                                                                         | 7 days | 28 days |
| Water Curing (Control)                               | 19.3                                                                  | 22.5   | 30.9    | 15.2                                                                           | 17.9   | 23.3    |
| Air Curing                                           | 15.8                                                                  | 18.5   | 23.3    | 12.4                                                                           | 14.5   | 16.9    |
| Membrane Curing                                      | 18.5                                                                  | 21.6   | 27.6    | 14.9                                                                           | 17.5   | 20.5    |
| Internal Curing (Air Curing)                         | 16.5                                                                  | 19.5   | 26.1    | 13.1                                                                           | 15.6   | 19.9    |
| Internal Curing (1 <sup>st</sup> 3 day water curing) | 17.9                                                                  | 20.5   | 27.3    | 13.9                                                                           | 16.3   | 19.3    |
| Internal Curing (28 day water)                       | 20.9                                                                  | 24.6   | 33.9    | 16.9                                                                           | 19.8   | 26.2    |

**Table S2.** Concrete Strength (MPa) under different Curing Condition and Curing Age using Vesicular Basalt and Pumice aggregates.

| Curing method                                        | Cube Compressive Strength<br>(w/c=0.35, Silica fume admixture and<br>Vesicular Basalt Agg. Internal curing) |        |         | Cube Compressive Strength<br>(w/c=0.5, Pumice Internal curing) |        |         |
|------------------------------------------------------|-------------------------------------------------------------------------------------------------------------|--------|---------|----------------------------------------------------------------|--------|---------|
|                                                      | 3 days                                                                                                      | 7 days | 28 days | 3 days                                                         | 7 days | 28 days |
| Water Curing (Control)                               | 30.9                                                                                                        | 38.1   | 44.1    | 19.3                                                           | 22.5   | 30.9    |
| Internal Curing (Air Curing)                         | 26.5                                                                                                        | 31.9   | 36.7    | 17.9                                                           | 20.4   | 27.5    |
| Internal Curing (1 <sup>st</sup> 3 day water curing) | 28.4                                                                                                        | 33.2   | 39.3    | 18.5                                                           | 21.1   | 28.7    |
| Internal Curing (28 day water)                       | 32.7                                                                                                        | 40.9   | 48.5    | 19.5                                                           | 22.9   | 31.5    |

**Table S3:** Relative Cube Strength with respect to control concrete and rate of development of concrete strength under different curing conditions (Surface /Volume Ratio = 40, w/c=0.5)

| Curing Conditions                                    | Age of Conc |            |             | % increase in Strength<br>(3 to 7 days) | % increase in Strength<br>(7 to 28 days) |
|------------------------------------------------------|-------------|------------|-------------|-----------------------------------------|------------------------------------------|
|                                                      | 3 days (%)  | 7 days (%) | 28 days (%) |                                         |                                          |
| Control Concrete                                     | --          | --         | --          | 16.6                                    | 37.3                                     |
| Air Curing                                           | -18.1       | -17.8      | -24.6       | 17.1                                    | 25.9                                     |
| Membrane Curing                                      | -4.1        | -4.0       | -10.7       | 16.8                                    | 27.8                                     |
| Internal Curing (Air Curing)                         | -14.5       | -13.3      | -15.5       | 18.2                                    | 33.8                                     |
| Internal Curing (1 <sup>st</sup> 3 day water curing) | -7.3        | -8.9       | -11.7       | 14.5                                    | 33.2                                     |
| Internal Curing (28 day water)                       | 8.3         | 9.3        | 9.7         | 17.7                                    | 37.8                                     |

**Table S4:** Relative Cylindrical Strength with respect to control concrete and rate of development of concrete strength under different curing conditions (Surface /Volume Ratio = 26.4, w/c=0.5)

| Curing Conditions                                    | Age of Concrete |            |             | % increase in Strength<br>(3 to 7 days) | % increase in Strength<br>(7 to 28 days) |
|------------------------------------------------------|-----------------|------------|-------------|-----------------------------------------|------------------------------------------|
|                                                      | 3 days (%)      | 7 days (%) | 28 days (%) |                                         |                                          |
| Control Concrete                                     | --              | --         | --          | 17.8                                    | 30.2                                     |
| Air Curing                                           | -18.4           | -19.0      | -27.5       | 16.9                                    | 16.6                                     |
| Membrane Curing                                      | -2.0            | -2.2       | -12.0       | 17.4                                    | 17.1                                     |
| Internal Curing (Air Curing)                         | -13.8           | -12.8      | -14.6       | 19.1                                    | 27.6                                     |
| Internal Curing (1 <sup>st</sup> 3 day water curing) | -8.6            | -8.9       | -17.2       | 17.3                                    | 18.4                                     |
| Internal Curing (28 day water)                       | 11.2            | 10.6       | 12.4        | 17.2                                    | 32.3                                     |

**Table 5.** Relative Cubical Strength of internal curing concrete having low water-cement ratio with respect to control concrete and rate of development of concrete strength (Surface /Volume Ratio = 40, w/c=0.35).

| Curing Conditions                                    | Age of Concrete |            |             | % increase in Strength<br>(3 to 7 days) | % increase in Strength<br>(7 to 28 days) |
|------------------------------------------------------|-----------------|------------|-------------|-----------------------------------------|------------------------------------------|
|                                                      | 3 days (%)      | 7 days (%) | 28 days (%) |                                         |                                          |
| Control Concrete                                     | --              | --         | --          | 23.3                                    | 15.7                                     |
| Internal Curing (Air Curing)                         | -14.2           | -16.3      | -16.8       | 20.4                                    | 15.0                                     |
| Internal Curing (1 <sup>st</sup> 3 day water curing) | -8.1            | -12.9      | -9.1        | 16.9                                    | 20.8                                     |
| Internal Curing (28 day water)                       | 5.8             | 7.3        | 10.0        | 25.1                                    | 18.6                                     |

**Table S6:** Relative Cubical Strength of Pumice aggregate blended internal curing concrete with respect to control concrete and rate of development of concrete strength (Surface /Volume Ratio = 40, w/c=0.5)

| Curing Conditions                                    | Age of Concrete |            |             | % increase in Strength<br>(3 to 7 days) | % increase in Strength<br>(7 to 28 days) |
|------------------------------------------------------|-----------------|------------|-------------|-----------------------------------------|------------------------------------------|
|                                                      | 3 days (%)      | 7 days (%) | 28 days (%) |                                         |                                          |
| Control Concrete                                     | --              | --         | --          | 16.6                                    | 37.3                                     |
| Internal Curing (Air Curing)                         | -7.3            | -9.3       | -11.0       | 14.0                                    | 34.8                                     |
| Internal Curing (1 <sup>st</sup> 3 day water curing) | -4.1            | -6.2       | -7.1        | 14.1                                    | 36.0                                     |
| Internal Curing (28 day water)                       | 1.0             | 1.8        | 1.9         | 17.4                                    | 37.6                                     |
